# Supplementary material
Source: publisher site journal article supplement (https://www.spandidos-publications.com/4247/downloadSupplementary)
Supplement: Supplementary file 1 [file downloadSupplementary]

## Sheet: Sheet1
Table IV. Differentially expressed lncRNAs resulting from treatment response in the articles which met inclusion criteria.
lncRNA	Ensemble codea	Expression	Comparison	Reference
CDKN2B-AS1	ENSG00000240498	up	ADR resistant vs. ADR sensitive	Chen et al. 2020 (29)
BALR-2 (CDK6-AS1)	ENSG00000237819	up	Poor response to prednisone	Fernando et al. 2015 (33)
GAS5	ENSG00000234741	up	Remission induction therapy day 15 vs. day 1	Gasic et al. 2017(34)
ZFAS	ENSG00000177410	up	MDR + vs. MDR-	Liu et al. 2019 (46)
NEAT1	ENSG00000245532	up	MDR + vs. MDR-	Pouyanrad et al. 2020 (40)
MALAT1	ENSG00000251562	up	MDR + vs. MDR-	Pouyanrad et al. 2020
aMissing Ensembl codes are due to lack of experimental sequence evidence required for code assignment.
